# Supplementary material for: Nutritional status of Indian adolescents (15-19 years) from National Family Health Surveys 3 and 4: Revised estimates using WHO 2007 Growth reference
Source: PLoS One. 2020 Jun 22;15(6):e0234570. doi: 10.1371/journal.pone.0234570 (PMC7307767; doi:10.1371/journal.pone.0234570)
Supplement: S1 Data — (XLSX) [file pone.0234570.s001.xlsx]

## Sheet: NFHS-4 Mean z-scores
Region	NFHS 4 (N)	NFHS 4 Mean BAZ Boys	SD	NFHS 4 Mean BAZ Girls	SD	NFHS 4 Overall mean BAZ	SD	NFHS 4 Mean HAZ Girls	SD	NFHS 4 Mean HAZ Boys	SD	NFHS 4 Overall mean HAZ	SD	Region	NFHS 3 (N)	NFHS 3 Mean BAZ Girls	SD	NFHS 3 Mean BAZ Boys	SD	NFHS 3 Overall Mean BAZ	SD	NFHS 3 Mean HAZ Girls	SD	NFHS 3 Mean HAZ Boys	SD	NFHS 3 Overall mean HAZ	SD
India	144332	-0.85	1.2	-0.64	1.03	-0.67	1.06	-1.66	0.9	-1.54	1.06	-1.64	0.93	India	35581	-0.71	1.01	-1.17	1.14	-0.87	1.08	-1.58	0.89	-1.38	0.99	-1.51	0.93
Rural	105694	-0.91	1.15	-0.69	0.99	-0.71	1.02	-1.69	0.9	-1.57	1.05	-1.68	0.92	Rural	19427	-0.76	0.94	-1.26	1.06	-0.93	1.01	-1.63	0.88	-1.48	0.97	-1.58	0.92
Urban	38674	-0.7	1.29	-0.52	1.12	-0.55	1.15	-1.56	0.9	-1.45	1.06	-1.54	0.93	Urban	16154	-0.65	1.09	-1.07	1.22	-0.81	1.16	-1.51	0.9	-1.27	0.99	-1.42	0.95
Andamans	479	-0.25	1.37	-0.1	1.11	-0.11	1.14	-1.41	0.99	-1.8	0.97	-1.45	0.99	Andamans
Andhra	1471	-0.76	1.41	-0.56	1.17	-0.59	1.21	-1.57	0.89	-1.31	0.98	-1.53	0.91	Andhra	2385	-0.73	1.13	-1.22	1.23	-0.96	1.2	-1.51	0.89	-1.15	0.94	-1.34	0.93
Arunachal	2462	-0.11	0.92	-0.08	0.86	-0.09	0.86	-1.97	0.84	-2.18	1.03	-2	0.87	Arunachal	558	-0.29	0.81	-0.5	0.8	-0.35	0.81	-1.88	0.82	-1.77	0.91	-1.85	0.85
Assam	5316	-0.65	1.02	-0.6	0.98	-0.6	0.99	-1.83	0.88	-1.73	0.98	-1.81	0.89	Assam	886	-0.73	0.92	-1.06	1.08	-0.81	0.98	-1.82	0.83	-1.53	1.02	-1.74	0.89
Bihar	11128	-1.06	1.12	-0.79	0.96	-0.82	0.98	-1.91	0.91	-1.72	1.04	-1.89	0.93	Bihar	1070	-0.89	0.92	-1.43	1.01	-1.01	0.96	-1.84	0.84	-1.37	0.97	-1.74	0.89
Chandigarh	126	-0.66	1.72	-0.53	1.26	-0.56	1.36	-1.16	0.97	-0.76	1.06	-1.08	1	Chandigarh
CG	5444	-0.89	1.07	-0.7	0.97	-0.73	0.98	-1.77	0.82	-1.75	0.96	-1.76	0.84	CG	1053	-0.93	0.9	-1.49	0.97	-1.07	0.95	-1.63	-0.88	-1.45	0.97	-1.58	0.91
DNH	170	-0.68	1.26	-0.88	1.15	-0.84	1.17	-1.7	0.88	-1.83	1.02	-1.73	0.91	DNH
Daman Diu	286	-0.77	1.45	-0.59	1.21	-0.64	1.28	-1.53	0.91	-1.64	1.17	-1.56	0.98	Daman Diu
Delhi	872	-0.64	1.25	-0.46	1.12	-0.49	1.14	-1.52	0.89	-1.48	1.02	-1.52	0.91	Delhi	681	-0.5	1.02	-0.7	1.01	-0.56	1.02	-1.52	0.98	-1.4	1.04	-1.48	1
Goa	368	-0.46	1.33	-0.56	1.27	-0.52	1.29	-1.41	0.95	-1.26	1.05	-1.36	0.99	Goa	648	-0.84	1.18	-1.15	1.32	-0.91	1.22	-1.43	0.91	-1.38	0.98	-1.42	0.93
Gujarat	4714	-1.04	1.39	-0.91	1.19	-0.94	1.23	-1.54	0.91	-1.43	1.01	-1.52	0.93	Gujarat	910	-0.98	1.09	-1.45	1.18	-1.11	1.13	-1.44	0.83	-1.26	1	-1.39	0.88
Haryana	3908	-0.56	1.17	-0.6	1.02	-0.6	1.04	-1.42	0.88	-1.4	1.02	-1.42	0.9	Haryana	759	-0.77	0.98	-1.13	1.22	-0.87	1.07	-1.22	0.81	-0.91	0.96	-1.13	0.87
Himachal	1791	-0.85	1.13	-0.66	1.04	-0.71	1.06	-1.24	0.88	-1.03	1.01	-1.2	0.91	Himachal	732	-0.97	1.06	-1.33	1.13	-1.07	1.09	-1.28	0.86	-1.14	0.92	-1.24	0.88
J and K	5193	-0.52	1.07	-0.31	1.02	-0.35	1.03	-1.24	0.99	-1.26	1.19	-1.24	1.03	J and K	896	-0.52	0.96	-1.01	1.09	-0.66	1.02	-1.12	0.89	-1.04	1.09	-1.1	0.95
Jharkhand	6449	-0.98	1.1	-0.75	0.95	-0.78	0.97	-1.96	0.85	-1.87	1.04	-1.95	0.88	Jharkhand	768	-0.85	0.87	-1.29	0.95	-0.95	0.91	-1.96	0.87	-1.54	0.95	-1.86	0.91
Karnataka	4363	-1.08	1.29	-0.77	1.13	-0.81	1.16	-1.59	0.9	-1.72	1.15	-1.61	0.93	Karnataka	1814	-0.92	1.05	-1.55	1.14	-1.19	1.14	-1.48	0.9	-1.45	1.01	-1.46	0.95
Kerala	1799	-0.32	1.3	-0.42	1.11	-0.4	1.14	-1.29	0.93	-1.36	1.1	-1.3	0.96	Kerala	705	-0.51	1.11	-1.22	1.19	-0.68	1.17	-1.3	0.91	-0.96	0.87	-1.22	0.91
Lakshadweep	143	-0.48	1.05	-0.38	1.23	-0.39	1.21	-1.4	0.87	-1.76	0.75	-1.43	0.86	Lakshadweep
Manipur	2408	-0.37	1	-0.15	0.88	-0.18	0.9	-1.58	0.78	-1.53	0.83	-1.58	0.78	Manipur	1382	-0.29	0.8	-0.7	0.89	-0.47	0.87	-1.63	0.77	-1.54	0.83	-1.59	0.8
Meghalaya	2049	-0.38	0.87	-0.08	0.78	-0.11	0.8	-2.2	0.8	-2.25	1.05	-2.21	0.83	Meghalaya	596	-0.29	0.79	-0.58	0.96	-0.36	0.85	-2.3	0.89	-2.45	1.11	-2.34	0.95
Maharashtra	5446	-1.08	1.31	-0.8	1.14	-0.84	1.17	-1.6	0.89	-1.6	1.14	-1.6	0.93	Maharashtra	2856	-0.95	1.09	-1.47	1.25	-1.2	1.2	-1.51	0.94	-1.3	0.98	-1.4	0.96
Mizoram	2231	-0.22	0.88	-0.04	0.82	-0.06	0.83	-1.51	0.82	-1.58	0.83	-1.52	0.82	Mizoram	426	-0.11	0.76	-0.54	0.86	-0.23	0.81	-1.69	0.78	-1.77	0.96	-1.71	0.83
MP	13783	-1.21	1.2	-0.79	0.99	-0.85	1.03	-1.56	0.88	-1.48	1.03	-1.55	0.9	MP	1787	-0.84	1	-1.3	1.16	-0.97	1.07	-1.52	0.84	-1.36	1	-1.48	0.89
Nagaland	1883	-0.61	0.87	-0.33	0.84	-0.36	0.85	-1.52	0.8	-1.69	0.98	-1.54	0.82	Nagaland	1515	-0.38	0.78	-0.68	0.9	-0.52	0.85	-1.58	0.76	-1.76	0.9	-1.67	0.84
Orissa	6251	-0.77	1.17	-0.62	1.02	-0.63	1.04	-1.83	0.89	-1.7	1.04	-1.82	0.91	Orissa	1079	-0.78	0.91	-1.12	1.05	-0.85	0.96	-1.75	0.84	-1.45	0.9	-1.68	0.86
Pondicherry	663	-0.59	1.41	-0.42	1.28	-0.44	1.3	-1.39	0.91	-1.56	1.03	-1.41	0.93	Pondicherry
Punjab	3171	-0.53	1.25	-0.59	1.1	-0.59	1.13	-1.3	0.84	-1.14	1.11	-1.27	0.89	Punjab	888	-0.62	1.03	-0.88	1.26	-0.69	1.11	-1.17	0.87	-0.92	1.08	-1.09	0.94
Rajasthan	9521	-0.95	1.23	-0.82	1.02	-0.83	1.05	-1.32	0.84	-1.28	1.07	-1.32	0.87	Rajasthan	1137	-0.85	0.96	-1.36	1.01	-0.98	1	-1.21	0.88	-1.1	0.9	-1.18	0.89
Sikkim	970	0.19	0.93	-0.07	0.82	-0.04	0.84	-1.72	0.7	-2.28	0.94	-1.79	0.76	Sikkim	593	-0.15	0.9	-0.42	1	-0.22	0.93	-1.84	0.84	-2	1.14	-1.88	0.92
Telangana	1185	-1.17	1.28	-0.78	1.2	-0.83	1.22	-1.56	0.87	-1.18	0.86	-1.5	0.88	Telangana
TamilNadu	4772	-0.8	1.29	-0.6	1.17	-0.63	1.19	-1.54	0.95	-1.6	1.12	-1.55	0.98	TamilNadu	1660	-0.76	1.16	-1.31	1.25	-1.02	1.23	-1.43	0.91	-1.3	0.95	-1.37	0.93
Tripura	849	-0.62	1.14	-0.36	0.98	-0.4	1	-1.99	0.91	-1.95	0.96	-1.99	0.92	Tripura	566	-0.71	1.04	-1.31	1.03	-0.84	1.07	-1.92	0.89	-1.69	0.84	-1.87	0.88
Uttarakhand	3707	-0.76	1.16	-0.5	1.01	-0.53	1.03	-1.59	0.87	-1.46	1.02	-1.57	0.89	Uttarakhand	778	-0.72	1	-1.26	0.99	-0.84	1.02	-1.46	0.86	-1.36	0.99	-1.44	0.89
UP	25554	-1	1.11	-0.7	0.96	-0.73	0.99	-1.77	0.88	-1.5	0.99	-1.74	0.89	UP	4821	-0.69	0.92	-1.16	1.05	-0.92	1.01	-1.7	0.84	-1.38	0.96	-1.54	0.92
WB	3448	-0.86	1.12	-0.59	1.04	-0.62	1.05	-1.8	0.84	-1.57	0.93	-1.78	0.85	WB	1632	-0.73	1.03	-1.08	1.13	-0.81	1.06	-1.8	0.81	-1.44	0.93	-1.72	0.85

## Sheet: NFHS-4 thin_stunted proportions
	Region	% thin boys	CI	% thin girls	CI	% Overall thin	CI	% overweight boys	CI	% overweight girls	CI	%Overall overweight	CI	Region	% stunted boys	CI	% stunted girls	CI	Overall stunted	CI
10	Chandigarh	26.9	(8%, 45.9%)	9.9	(3.6%, 16.2%)	13.4	(7.1%, 19.7%)	19.2	(2.2%, 36.3%)	11.9	(5.1%, 18.7%)	13.4	(7.1%, 19.7%)	Chandigarh	15.4	(0%, 31.2%)	16	(8.3%, 23.7%)	15.9	(9.1%, 22.7%)
17	Himachal	15.1	(11.5%, 18.7%)	9.8	(8.2%, 11.4%)	11	(9.5%, 12.5%)	6.3	(3.9%, 8.8%)	4.9	(3.7%, 6%)	5.2	(4.1%, 6.3%)	Himachal	15.8	(12.1%, 19.4%)	18	(15.9%, 20%)	17.5	(15.7%, 19.3%)
31	Punjab	12.6	(9.5%, 15.6%)	9.6	(8.5%, 10.7%)	10.1	(9%, 11.1%)	10.1	(7.3%, 12.9%)	5.8	(4.9%, 6.7%)	6.4	(5.6%, 7.3%)	Punjab	22.5	(18.7%, 26.3%)	18.4	(16.9%, 19.9%)	19	(17.7%, 20.4%)
32	Rajasthan	19.2	(16.9%, 21.4%)	11.8	(11.1%, 12.5%)	12.8	(12.1%, 13.4%)	4.3	(3.1%, 5.5%)	3.1	(2.7%, 3.4%)	3.2	(2.9%, 3.6%)	Rajasthan	25.5	(23%, 28%)	20.1	(19.3%, 21%)	20.8	(20%, 21.6%)
18	J and K	8.8	(7%, 10.5%)	5.2	(4.5%, 5.9%)	5.9	(5.3%, 6.6%)	7.2	(5.6%, 8.8%)	9	(8.1%, 9.8%)	8.6	(7.8%, 9.4%)	J and K	24.3	(21.7%, 27%)	20.4	(19.1%, 21.6%)	21.2	(20%, 22.3%)
21	Kerala	9.8	(6.3%, 13.3%)	7.2	(5.8%, 8.5%)	7.6	(6.4%, 8.9%)	15	(10.8%, 19.1%)	9.4	(7.9%, 11%)	10.4	(9%, 11.8%)	Kerala	28.8	(23.5%, 34%)	19.9	(17.8%, 22%)	21.4	(19.5%, 23.3%)
16	Haryana	10.3	(7.7%, 12.8%)	8	(7%, 8.9%)	8.3	(7.4%, 9.2%)	6.8	(4.7%, 9%)	5	(4.2%, 5.7%)	5.2	(4.5%, 6%)	Haryana	28.5	(24.8%, 32.3%)	23	(21.5%, 24.4%)	23.8	(22.4%, 25.1%)
30	Pondicherry	15.7	(7.6%, 23.9%)	11.3	(8.6%, 14%)	11.9	(9.4%, 14.5%)	12.4	(5%, 19.8%)	11.5	(8.8%, 14.2%)	11.6	(9.1%, 14.1%)	Pondicherry	34.8	(24.4%, 45.3%)	22.8	(19.3%, 26.3%)	24.4	(21.1%, 27.8%)
14	Goa	10.5	(4.7%, 16.3%)	15.2	(10.5%, 19.9%)	13.6	(10%, 17.2%)	14.5	(7.9%, 21.1%)	9.4	(5.6%, 13.3%)	11.1	(7.8%, 14.5%)	Goa	20.2	(12.7%, 27.6%)	27	(21.3%, 32.8%)	24.7	(20.2%, 29.3%)
26	Mizoram	2.2	(0.3%, 4.1%)	1.3	(0.8%, 1.9%)	1.4	(0.9%, 2%)	6.9	(3.7%, 10.1%)	8.8	(7.6%, 10.1%)	8.6	(7.4%, 9.8%)	Mizoram	29.1	(23.5%, 34.6%)	25.9	(24%, 27.9%)	26.3	(24.5%, 28.2%)
28	Nagaland	3.5	(0.9%, 6.1%)	2.4	(1.6%, 3.1%)	2.5	(1.8%, 3.2%)	3.9	(1.2%, 6.7%)	5.4	(4.3%, 6.6%)	5.3	(4.2%, 6.3%)	Nagaland	39.5	(32.9%, 46%)	25.5	(23.4%, 27.6%)	27.2	(25.2%, 29.2%)
35	Telangana	28	(20.9%, 35.1%)	15.5	(13.2%, 17.7%)	17.2	(15%, 19.4%)	6	(2.1%, 9.8%)	7.3	(5.6%, 8.9%)	7.1	(5.6%, 8.6%)	Telangana	14.9	(9.2%, 20.6%)	29.7	(26.8%, 32.6%)	27.6	(25%, 30.2%)
22	Lakshadweep	0	(0%, 3.3%)	10.2	(4.6%, 15.9%)	9.2	(4.1%, 14.3%)	13.3	(0%, 33.9%)	11	(5.2%, 16.9%)	11.3	(5.7%, 16.8%)	Lakshadweep	53.3	(24.8%, 81.9%)	25	(17.1%, 32.9%)	28	(20.3%, 35.7%)
24	Manipur	3.3	(1.1%, 5.5%)	2.2	(1.5%, 2.8%)	2.3	(1.7%, 3%)	8.6	(5.3%, 12%)	8.2	(7%, 9.4%)	8.2	(7.1%, 9.4%)	Manipur	29.2	(23.9%, 34.5%)	28.8	(26.8%, 30.7%)	28.8	(27%, 30.7%)
12	Delhi	11.6	(5.5%, 17.7%)	7.9	(5.9%, 9.8%)	8.4	(6.5%, 10.3%)	8.3	(2.9%, 13.6%)	9.3	(7.2%, 11.5%)	9.2	(7.2%, 11.1%)	Delhi	32.2	(23.5%, 41%)	28.6	(25.3%, 31.9%)	29.1	(26.1%, 32.2%)
5	Andhra	18.3	(12.5%, 24.1%)	10.2	(8.5%, 11.9%)	11.2	(9.6%, 12.9%)	11.8	(6.9%, 16.7%)	9.3	(7.6%, 10.9%)	9.6	(8%, 11.1%)	Andhra	22	(15.8%, 28.3%)	30.2	(27.6%, 32.7%)	29.2	(26.8%, 31.5%)
15	Gujarat	25.3	(22.5%, 28.1%)	17.8	(16.6%, 19.1%)	19.3	(18.2%, 20.5%)	8.7	(6.9%, 10.6%)	6	(5.2%, 6.8%)	6.5	(5.8%, 7.3%)	Gujarat	27.8	(24.8%, 30.7%)	30	(28.5%, 31.5%)	29.6	(28.3%, 30.9%)
2	Urban	15.4	(14.4%, 16.3%)	9	(8.7%, 9.3%)	9.9	(9.6%, 10.2%)	8.8	(8%, 9.5%)	8.3	(8%, 8.6%)	8.4	(8.1%, 8.6%)	Urban	29.7	(28.5%, 30.9%)	30	(29.5%, 30.5%)	29.9	(29.5%, 30.4%)
27	MP	24.8	(22.8%, 26.8%)	10.7	(10.1%, 11.3%)	12.5	(12%, 13.1%)	3.6	(2.7%, 4.4%)	3.3	(2.9%, 3.6%)	3.3	(3%, 3.6%)	MP	29.2	(27.1%, 31.4%)	30	(29.1%, 30.8%)	29.9	(29.1%, 30.6%)
38	Uttarakhand	13.2	(10%, 16.5%)	6.8	(5.9%, 7.7%)	7.6	(6.7%, 8.5%)	6.4	(4%, 8.8%)	5.8	(5%, 6.6%)	5.9	(5.1%, 6.6%)	Uttarakhand	27.9	(23.6%, 32.1%)	30.8	(29.2%, 32.4%)	30.4	(28.9%, 31.9%)
4	Andamans	16	(4.8%, 27.2%)	4.4	(2.4%, 6.5%)	5.6	(3.5%, 7.8%)	18	(6.4%, 29.6%)	12.4	(9.1%, 15.6%)	12.9	(9.8%, 16.1%)	Andamans	41.2	(26.7%, 55.7%)	29.5	(25.1%, 34%)	30.8	(26.5%, 35%)
34	TamilNadu	19.1	(16.2%, 21.9%)	11.2	(10.3%, 12.2%)	12.5	(11.5%, 13.4%)	8.8	(6.7%, 10.9%)	8.1	(7.2%, 9%)	8.2	(7.4%, 9%)	TamilNadu	34.8	(31.4%, 38.3%)	30.2	(28.8%, 31.7%)	31	(29.6%, 32.3%)
23	Maharashtra	24.4	(21.3%, 27.6%)	13.9	(12.9%, 14.9%)	15.4	(14.4%, 16.3%)	6.8	(4.9%, 8.7%)	6	(5.3%, 6.7%)	6.1	(5.5%, 6.8%)	Maharashtra	35.1	(31.6%, 38.5%)	31.4	(30.1%, 32.7%)	31.9	(30.7%, 33.2%)
11	Daman Diu	20.3	(10.4%, 30.1%)	11.8	(7.3%, 16.4%)	14	(9.8%, 18.2%)	10.8	(3.1%, 18.6%)	10.9	(6.5%, 15.3%)	10.9	(7.1%, 14.7%)	Daman Diu	37.8	(26.1%, 49.6%)	32.1	(25.6%, 38.6%)	33.6	(27.9%, 39.2%)
20	Karnataka	24.9	(21.1%, 28.6%)	13.3	(12.2%, 14.4%)	14.8	(13.7%, 15.8%)	4.6	(2.7%, 6.4%)	6	(5.3%, 6.8%)	5.8	(5.1%, 6.5%)	Karnataka	40	(35.8%, 44.2%)	32.8	(31.3%, 34.3%)	33.7	(32.3%, 35.1%)
13	DNH	14.7	(1.3%, 28.1%)	15.6	(9.1%, 22%)	15.4	(9.6%, 21.1%)	11.8	(0%, 24.1%)	5.9	(1.6%, 10.3%)	7.1	(2.9%, 11.3%)	DNH	44.1	(26%, 62.3%)	31.6	(23.4%, 39.8%)	34.1	(26.7%, 41.5%)
1	India	16.5	(16%, 17%)	9	(8.8%, 9.2%)	10	(9.8%, 10.1%)	5.9	(5.5%, 6.2%)	5	(4.8%, 5.1%)	5.1	(4.9%, 5.2%)	India	32.2	(31.6%, 32.9%)	34.4	(34.2%, 34.7%)	34.1	(33.9%, 34.4%)
3	Rural	17	(16.4%, 17.6%)	9	(8.8%, 9.2%)	10	(9.8%, 10.2%)	4.6	(4.2%, 5%)	0.5	(0.5%, 0.6%)	3.9	(3.7%, 4%)	Rural	33.3	(32.5%, 34.1%)	36	(35.7%, 36.3%)	35.7	(35.4%, 36%)
33	Sikkim	2.6	(0%, 5.9%)	2.3	(1.3%, 3.4%)	2.4	(1.4%, 3.4%)	17.1	(9.8%, 24.3%)	7.9	(6%, 9.7%)	9	(7.1%, 10.8%)	Sikkim	61.5	(52.3%, 70.8%)	33.5	(30.3%, 36.8%)	36.9	(33.8%, 40%)
37	UP	17.4	(16%, 18.7%)	8.3	(7.9%, 8.6%)	9.3	(9%, 9.7%)	3.9	(3.2%, 4.6%)	3.8	(3.6%, 4.1%)	3.8	(3.6%, 4.1%)	UP	29.6	(27.9%, 31.2%)	39.4	(38.8%, 40%)	38.2	(37.6%, 38.8%)
9	CG	13.5	(10.8%, 16.3%)	8.1	(7.3%, 8.9%)	8.7	(8%, 9.5%)	3.6	(2.1%, 5.1%)	3.3	(2.8%, 3.8%)	3.3	(2.9%, 3.8%)	CG	41.9	(38%, 45.7%)	38.1	(36.7%, 39.5%)	38.6	(37.3%, 39.9%)
39	WB	16.4	(12.5%, 20.3%)	9	(8%, 10%)	9.8	(8.8%, 10.8%)	4.5	(2.3%, 6.7%)	6	(5.1%, 6.8%)	5.8	(5%, 6.6%)	WB	30.7	(25.9%, 35.5%)	39.8	(38.1%, 41.6%)	38.8	(37.2%, 40.4%)
29	Orissa	13.6	(10.8%, 16.3%)	7.7	(7%, 8.5%)	8.3	(7.7%, 9%)	6.2	(4.3%, 8.2%)	5.4	(4.8%, 6%)	5.5	(4.9%, 6.1%)	Orissa	39.1	(35.2%, 42.9%)	41.8	(40.5%, 43.1%)	41.5	(40.3%, 42.8%)
7	Assam	8.6	(6.4%, 10.9%)	7.5	(6.7%, 8.2%)	7.6	(6.9%, 8.3%)	5.2	(3.4%, 6.9%)	4.6	(3.9%, 5.2%)	4.6	(4.1%, 5.2%)	Assam	37.3	(33.5%, 41%)	42.1	(40.7%, 43.5%)	41.5	(40.2%, 42.9%)
8	Bihar	19.6	(17.3%, 21.9%)	9.6	(9%, 10.2%)	10.7	(10.1%, 11.3%)	3.2	(2.2%, 4.3%)	2.5	(2.1%, 2.8%)	2.5	(2.2%, 2.8%)	Bihar	37.2	(34.5%, 40%)	44.9	(43.9%, 45.9%)	44.1	(43.2%, 45%)
19	Jharkhand	17.7	(14.8%, 20.6%)	8.8	(8.1%, 9.6%)	9.8	(9.1%, 10.6%)	2.7	(1.4%, 3.9%)	2.5	(2.1%, 3%)	2.6	(2.2%, 3%)	Jharkhand	44.2	(40.5%, 47.9%)	47.9	(46.6%, 49.2%)	47.5	(46.3%, 48.7%)
36	Tripura	12.3	(5.8%, 18.7%)	4.5	(2.9%, 6.1%)	5.5	(3.9%, 7.1%)	7.9	(2.5%, 13.3%)	7.6	(5.6%, 9.6%)	7.7	(5.8%, 9.5%)	Tripura	48.7	(39%, 58.3%)	49.2	(45.5%, 52.9%)	49.1	(45.7%, 52.5%)
6	Arunachal	3.3	(1.1%, 5.5%)	2	(1.4%, 2.6%)	2.2	(1.6%, 2.7%)	8.6	(5.3%, 11.9%)	8.1	(6.9%, 9.3%)	8.2	(7.1%, 9.3%)	Arunachal	56.1	(50.4%, 61.9%)	48.5	(46.4%, 50.6%)	49.4	(47.4%, 51.4%)
25	Meghalaya	3.3	(0.8%, 5.8%)	1.5	(0.9%, 2.1%)	1.7	(1.1%, 2.3%)	3.7	(1.1%, 6.3%)	4.9	(3.8%, 5.9%)	4.7	(3.8%, 5.7%)	Meghalaya	60.7	(54.4%, 67.1%)	61.6	(59.4%, 63.9%)	61.5	(59.4%, 63.7%)

## Sheet: NFHS-3 Stunting
	Region	% stunted boys	CI	% stunted girls	CI	Overall stunted	CI
31	Punjab	16.7	(11.9%, 21.4%)	13.8	(11%, 16.6%)	14.6	(12.3%, 17%)
16	Haryana	13.1	(8.4%, 17.9%)	15.6	(12.4%, 18.7%)	14.9	(12.3%, 17.5%)
18	J and K	17.1	(12.3%, 22%)	16.9	(13.9%, 19.9%)	17	(14.5%, 19.5%)
32	Rajasthan	14.2	(10%, 18.3%)	18.1	(15.4%, 20.7%)	17.1	(14.8%, 19.3%)
17	Himachal	14.9	(9.7%, 20%)	19.2	(15.8%, 22.7%)	18	(15.2%, 20.9%)
21	Kerala	11.9	(6.7%, 17.1%)	22	(18.4%, 25.6%)	19.6	(16.6%, 22.6%)
15	Gujarat	21.1	(15.7%, 26.5%)	24.1	(20.8%, 27.4%)	23.3	(20.5%, 26.1%)
34	TamilNadu	22.3	(19.3%, 25.2%)	24.6	(21.7%, 27.5%)	23.5	(21.4%, 25.6%)
5	Andhra	19.3	(16.9%, 21.6%)	28.5	(26%, 31.1%)	24.2	(22.5%, 26%)
23	Maharashtra	21.1	(18.9%, 23.2%)	29.7	(27.4%, 32.1%)	25.5	(23.9%, 27.1%)
3	Urban	22.2	(21.2%, 23.2%)	28.5	(27.6%, 29.4%)	26.1	(25.4%, 26.8%)
38	Uttarakhand	27.3	(20.4%, 34.1%)	25.9	(22.3%, 29.5%)	26.2	(23.1%, 29.4%)
20	Karnataka	26.6	(23.4%, 29.7%)	26.6	(23.8%, 29.3%)	26.6	(24.5%, 28.6%)
14	Goa	24.7	(17.4%, 31.9%)	27.5	(23.5%, 31.5%)	26.9	(23.4%, 30.3%)
27	MP	25.2	(21.2%, 29.1%)	27.5	(25%, 30%)	26.9	(24.8%, 28.9%)
24	Manipur	26.3	(22.8%, 29.9%)	31.1	(27.7%, 34.5%)	28.9	(26.5%, 31.4%)
1	India	25.2	(24.4%, 26%)	31.2	(30.6%, 31.8%)	29.1	(28.6%, 29.6%)
12	Delhi	27.4	(21.1%, 33.6%)	30.9	(26.6%, 35.2%)	29.8	(26.3%, 33.3%)
37	UP	24	(22.3%, 25.8%)	35.5	(33.6%, 37.5%)	29.9	(28.6%, 31.2%)
2	Rural	28.1	(27%, 29.2%)	33.3	(32.5%, 34.1%)	31.6	(30.9%, 32.3%)
9	CG	26.3	(20.7%, 31.8%)	34.1	(30.8%, 37.5%)	32.2	(29.3%, 35.1%)
26	Mizoram	35	(26%, 44.1%)	33	(27.6%, 38.4%)	33.6	(29%, 38.2%)
28	Nagaland	41.1	(37.4%, 44.7%)	27.6	(24.4%, 30.8%)	34.1	(31.6%, 36.5%)
29	Orissa	24.5	(18.7%, 30.2%)	37.7	(34.4%, 41%)	34.8	(32%, 37.7%)
39	WB	29.7	(25%, 34.4%)	38.9	(36.2%, 41.7%)	36.8	(34.4%, 39.1%)
8	Bihar	23.2	(17.6%, 28.8%)	41.7	(38.2%, 45.1%)	37.6	(34.6%, 40.5%)
7	Assam	30.5	(24.3%, 36.6%)	42.6	(38.7%, 46.4%)	39.4	(36.1%, 42.7%)
6	Arunachal	40.9	(32.8%, 49%)	44.8	(39.8%, 49.8%)	43.7	(39.5%, 47.9%)
19	Jharkhand	31.4	(24.4%, 38.3%)	47.9	(43.7%, 52%)	43.9	(40.3%, 47.5%)
36	Tripura	40.2	(31.1%, 49.3%)	45	(40.3%, 49.8%)	44	(39.8%, 48.2%)
33	Sikkim	52.8	(44.3%, 61.3%)	41.9	(37.2%, 46.5%)	44.5	(40.4%, 48.6%)
25	Meghalaya	62.9	(54.9%, 70.9%)	64.3	(59.7%, 68.8%)	63.9	(60%, 67.9%)

## Sheet: NFHS-3 thinness_OW_OB
	Region	N	% thin boys	CI	% thin girls	CI	% Overall thin	CI	% overweight boys	CI	% overweight girls	CI	%Overall overweight	CI
31	Punjab	888	17.4	(12.6%, 22.3%)	7.8	(5.6%, 9.9%)	10.6	(8.5%, 12.7%)	8.1	(4.6%, 11.7%)	6.7	(4.6%, 8.7%)	7.1	(5.3%, 8.8%)
21	Kerala	705	26.8	(19.8%, 33.8%)	7.3	(5%, 9.6%)	11.9	(9.5%, 14.4%)	1.8	(0%, 4.1%)	8.2	(5.8%, 10.6%)	6.7	(4.8%, 8.6%)
33	Sikkim	594	4.9	(1%, 8.7%)	2.9	(1.2%, 4.5%)	3.4	(1.8%, 4.9%)	5.6	(1.5%, 9.6%)	7.1	(4.6%, 9.6%)	6.7	(4.6%, 8.8%)
34	TamilNadu	1656	29.7	(26.5%, 33%)	13.5	(11.2%, 15.8%)	21.1	(19.1%, 23.1%)	4.9	(3.3%, 6.4%)	7.1	(5.3%, 8.8%)	6	(4.9%, 7.2%)
3	Urban	16146	21.3	(20.2%, 22.3%)	10.5	(9.9%, 11.1%)	14.6	(14.1%, 15.2%)	4.9	(4.3%, 5.4%)	6.7	(6.2%, 7.2%)	6	(5.6%, 6.4%)
12	Delhi	680	7.6	(3.8%, 11.4%)	7.2	(4.8%, 9.7%)	7.4	(5.3%, 9.4%)	5.2	(2%, 8.4%)	6.4	(4.1%, 8.7%)	6	(4.2%, 7.9%)
26	Mizoram	426	4.3	(0.2%, 8.4%)	1	(0%, 2.2%)	1.9	(0.5%, 3.3%)	3.4	(0%, 7.1%)	6.8	(3.8%, 9.8%)	5.9	(3.5%, 8.2%)
5	Andhra	2384	24.6	(22%, 27.2%)	12.4	(10.5%, 14.2%)	18	(16.5%, 19.6%)	4.4	(3.2%, 5.7%)	0.9	(0.4%, 1.5%)	5.8	(4.8%, 6.7%)
14	Goa	648	27.3	(19.9%, 34.8%)	16.5	(13.1%, 19.8%)	19	(15.9%, 22.1%)	4.7	(1%, 8.4%)	6	(3.8%, 8.2%)	5.7	(3.8%, 7.6%)
18	J and K	897	17.5	(12.6%, 22.4%)	5.7	(3.9%, 7.6%)	9	(7.1%, 11%)	2.8	(0.6%, 5%)	6	(4.1%, 8%)	5.1	(3.6%, 6.6%)
39	WB	1632	17.7	(13.8%, 21.7%)	10.3	(8.6%, 12.1%)	12.1	(10.5%, 13.7%)	2.9	(1.1%, 4.7%)	4.9	(3.7%, 6.1%)	4.4	(3.4%, 5.4%)
16	Haryana	759	23	(17.1%, 28.9%)	8.8	(6.3%, 11.3%)	12.8	(10.3%, 15.2%)	6.6	(3%, 10.1%)	3.5	(1.9%, 5.1%)	4.3	(2.8%, 5.9%)
24	Manipur	1381	6.1	(4.1%, 8.1%)	2.4	(1.2%, 3.5%)	4.1	(3%, 5.1%)	2.6	(1.2%, 3.9%)	5.3	(3.6%, 6.9%)	4.1	(3%, 5.1%)
23	Maharashtra	2856	34.5	(31.9%, 37%)	15.7	(13.8%, 17.6%)	24.9	(23.3%, 26.5%)	3.9	(2.8%, 4.9%)	4.4	(3.3%, 5.5%)	4.1	(3.4%, 4.9%)
1	India	35570	22.3	(21.6%, 23%)	9.9	(9.5%, 10.3%)	14.3	(13.9%, 14.7%)	3	(2.7%, 3.3%)	4.3	(4%, 4.6%)	3.8	(3.6%, 4%)
36	Tripura	566	28.7	(20.3%, 37.1%)	10.8	(7.8%, 13.8%)	14.7	(11.7%, 17.7%)	0.8	(0%, 2.8%)	4.1	(2.1%, 6%)	3.4	(1.8%, 4.9%)
15	Gujarat	910	30.8	(24.7%, 36.9%)	17.2	(14.3%, 20.2%)	20.8	(18.1%, 23.5%)	1.7	(0%, 3.5%)	3.9	(2.3%, 5.4%)	3.3	(2.1%, 4.5%)
38	Uttarakhand	778	21.6	(15.2%, 28%)	9.5	(7%, 11.9%)	12.2	(9.8%, 14.6%)	0	(0%, 0.3%)	4.2	(2.5%, 5.8%)	3.2	(1.9%, 4.5%)
28	Nagaland	1515	7.6	(5.6%, 9.5%)	2.3	(1.2%, 3.4%)	4.8	(3.7%, 5.9%)	2.6	(1.4%, 3.8%)	3.7	(2.3%, 5.1%)	3.2	(2.3%, 4.1%)
29	Orissa	1078	20.2	(14.8%, 25.5%)	9.3	(7.3%, 11.4%)	11.7	(9.7%, 13.7%)	3	(0.6%, 5.4%)	3.2	(2%, 4.4%)	3.2	(2.1%, 4.2%)
27	MP	1787	24.5	(20.7%, 28.4%)	12.5	(10.6%, 14.3%)	15.8	(14.1%, 17.6%)	2.4	(1%, 3.9%)	3.4	(2.4%, 4.4%)	3.1	(2.3%, 4%)
6	Arunachal	558	4.5	(0.9%, 8.2%)	2.7	(1%, 4.4%)	3.2	(1.7%, 4.8%)	1.3	(0%, 3.4%)	3.7	(1.7%, 5.7%)	3	(1.5%, 4.6%)
20	Karnataka	1810	36.7	(33.3%, 40.2%)	14.5	(12.3%, 16.7%)	24	(22%, 26%)	2.6	(1.4%, 3.8%)	3.4	(2.2%, 4.5%)	3	(2.2%, 3.9%)
7	Assam	886	18.9	(13.6%, 24.1%)	8.9	(6.6%, 11.1%)	11.5	(9.4%, 13.7%)	2.6	(0.3%, 4.8%)	3.2	(1.8%, 4.6%)	3	(1.9%, 4.2%)
37	UP	4822	19.8	(18.2%, 21.5%)	7.5	(6.5%, 8.6%)	13.5	(12.5%, 14.5%)	2.2	(1.6%, 2.8%)	3.6	(2.8%, 4.4%)	2.9	(2.4%, 3.4%)
17	Himachal	732	25.2	(19%, 31.5%)	16.6	(13.3%, 19.9%)	19	(16.1%, 21.9%)	2.5	(0.1%, 4.9%)	3	(1.5%, 4.6%)	2.9	(1.6%, 4.1%)
25	Meghalaya	596	5.3	(1.4%, 9.2%)	2.7	(1.1%, 4.3%)	3.4	(1.8%, 4.9%)	4	(0.5%, 7.4%)	1.6	(0.3%, 2.8%)	2.2	(0.9%, 3.4%)
2	Rural	19424	23.3	(22.3%, 24.3%)	9.5	(9%, 10%)	14	(13.5%, 14.5%)	1.2	(1%, 1.5%)	2.4	(2.2%, 2.7%)	2	(1.8%, 2.2%)
32	Rajasthan	1135	23.4	(18.4%, 28.4%)	11.2	(9%, 13.4%)	14.4	(12.3%, 16.4%)	0.3	(0%, 1.2%)	2.4	(1.3%, 3.5%)	1.9	(1%, 2.7%)
8	Bihar	1070	27	(21.1%, 32.9%)	10.9	(8.7%, 13.1%)	14.5	(12.3%, 16.6%)	0.4	(0%, 1.5%)	1.9	(0.9%, 2.9%)	1.6	(0.8%, 2.4%)
19	Jharkhand	768	20	(14%, 26%)	8.9	(6.5%, 11.3%)	11.6	(9.3%, 13.9%)	1.1	(0%, 2.8%)	1.7	(0.6%, 2.9%)	1.6	(0.6%, 2.5%)
9	CG	1053	27.8	(22.1%, 33.4%)	11.8	(9.5%, 14.1%)	15.8	(13.5%, 18%)	0.4	(0%, 1.3%)	1.5	(0.6%, 2.4%)	1.2	(0.5%, 1.9%)
